# Supplementary material for: Communication vs. waterproofing: the physics of insect cuticular hydrocarbons
Source: Oxford University Press journal article supplement (doi:10.1242/jeb.210807), 2019-01-01

Table S1. List of the species sampled in this study, together with their collection sites. Samples were collected in summer 2017 and 2018.

|                             | collection site            | collection date |
|-----------------------------|----------------------------|-----------------|
| <i>Formica polyctena</i> *  | Mainz, Ober-Olmer Wald     | August 2018     |
| <i>Formica rufibarbis</i> * | Mainz, meadow near Drais   | August 2018     |
| <i>Lasius brunneus</i>      | Mainz, Neustadt            | September 2018  |
| <i>Lasius fuliginosus</i> * | Mainz, Ober-Olmer Wald     | August 2018     |
| <i>Lasius neglectus</i> *   | Jena, Botanical garden     | September 2018  |
| <i>Lasius niger</i> *       | Mainz, meadow near Drais   | August 2018     |
| <i>Lasius platyborax</i> *  | Mainz, Ober-Olmer Wald     | August 2018     |
| <i>Myrmica rubra</i> *      | Mainz, Ober-Olmer Wald     | August 2018     |
| <i>Myrmica ruginodis</i> *  | Darmstadt, forest          | August 2017     |
| <i>Myrmica sabuleti</i>     | Bayreuth, Botanical garden | August 2017     |
| <i>Myrmica salina</i>       | Bayreuth, Botanical garden | August 2017     |

Table S2. Heat converted for melting between -75 °C and +60 °C extracted from DSC curves (second heating cycle). Values were determined via integration of the baseline corrected signals in 15 °C intervals and summed up to give the total melting heat. Relative values refer to the total heat set as 100%. Areas being slightly above baseline due to the baseline correction are marked in italics and were set to 0 (actual values are given in brackets) because they were considered negligible.

|                               |                    | -75 to<br>-60 °C        | -60 to<br>-45 °C        | -45 to<br>-30 °C | -30 to<br>-15 °C | -15 to 0 °C | 0 to 15 °C |
|-------------------------------|--------------------|-------------------------|-------------------------|------------------|------------------|-------------|------------|
| <i>Formica<br/>polyctena</i>  | heat / mJ          | 0.36312                 | 1.86245                 | 6.91989          | 16.61972         | 34.21124    | 24.98026   |
|                               | % of<br>total heat | 0.3                     | 1.3                     | 4.8              | 11.5             | 23.8        | 17.3       |
| <i>Formica<br/>rufibarbis</i> | heat / mJ          | 0.86869                 | 2.87114                 | 1.23311          | 13.83449         | 78.70639    | 24.87660   |
|                               | % of<br>total heat | 0.6                     | 2.1                     | 0.9              | 10.1             | 57.4        | 18.1       |
| <i>Lasius<br/>fuliginosus</i> | heat / mJ          | 0.78359                 | 4.89824                 | 10.31143         | 31.93359         | 19.41610    | 11.39091   |
|                               | % of<br>total heat | 1.0                     | 6.0                     | 12.5             | 38.8             | 23.6        | 13.9       |
| <i>Lasius<br/>neglectus</i>   | heat / mJ          | <i>0.0</i><br>(0.03494) | <i>0.0</i><br>(0.02409) | 0.46511          | 5.13222          | 5.39218     | 2.49449    |
|                               | % of<br>total heat | 0.0                     | 0.0                     | 3.3              | 36.2             | 38.0        | 17.6       |
| <i>Lasius<br/>niger</i>       | heat / mJ          | <i>0.0</i><br>(0.09742) | 0.30877                 | 2.71317          | 6.87460          | 19.20335    | 11.97190   |
|                               | % of<br>total heat | 0.0                     | 0.5                     | 4.1              | 10.5             | 29.3        | 18.3       |
| <i>Lasius<br/>platythorax</i> | heat / mJ          | <i>0.0</i><br>(0.00946) | <i>0.0</i><br>(0.02426) | 0.38077          | 2.62343          | 4.44898     | 2.31883    |
|                               | % of<br>total heat | 0.0                     | 0.0                     | 3.7              | 25.6             | 43.4        | 22.6       |
| <i>Myrmica<br/>ruginodis</i>  | heat / mJ          | <i>0.0</i><br>(0.33855) | 1.23845                 | 6.12977          | 12.80844         | 19.68661    | 20.91367   |
|                               | % of<br>total heat | 0.0                     | 1.8                     | 8.8              | 18.5             | 28.4        | 30.2       |
| <i>Myrmica<br/>rubra</i>      | heat / mJ          | 0.01116                 | 0.03101                 | 0.51440          | 0.91569          | 3.47433     | 1.15866    |
|                               | % of<br>total heat | 0.2                     | 0.4                     | 7.0              | 12.4             | 47.2        | 15.8       |

|                               |                    | 15 to 30<br>°C | 30 to 45 °C   | 45 to 60 °C   | total     |
|-------------------------------|--------------------|----------------|---------------|---------------|-----------|
| <i>Formica<br/>polycтена</i>  | heat / mJ          | 17.50006       | 40.74417      | 0.83581       | 144.03672 |
|                               | % of<br>total heat | 12.1           | 28.3          | 0.6           | 100       |
| <i>Formica<br/>rufibarbis</i> | heat / mJ          | 10.08670       | 3.55870       | 1.03363       | 137.06945 |
|                               | % of<br>total heat | 7.4            | 2.6           | 0.8           | 100       |
| <i>Lasius<br/>fuliginosus</i> | heat / mJ          | 3.45768        | 0.0 (0.75923) | 0.0 (0.49584) | 82.19154  |
|                               | % of<br>total heat | 4.2            | 0.0           | 0.0           | 100       |
| <i>Lasius<br/>neglectus</i>   | heat / mJ          | 0.65904        | 0.0 (0.04404) | 0.03849       | 14.18153  |
|                               | % of<br>total heat | 4.6            | 0.0           | 0.3           | 100       |
| <i>Lasius<br/>niger</i>       | heat / mJ          | 12.08685       | 12.30039      | 0.0 (0.79214) | 65.45903  |
|                               | % of<br>total heat | 18.5           | 18.8          | 0.0           | 100       |
| <i>Lasius<br/>platythorax</i> | heat / mJ          | 0.48422        | 0.00116       | 0.0 (0.00746) | 10.25739  |
|                               | % of<br>total heat | 4.7            | 0.0           | 0.0           | 100       |
| <i>Myrmica<br/>ruginodis</i>  | heat / mJ          | 6.33235        | 2.18467       | 0.0 (0.27681) | 69.29396  |
|                               | % of<br>total heat | 9.1            | 3.2           | 0.0           | 100       |
| <i>Myrmica<br/>rubra</i>      | heat / mJ          | 1.25315        | 0.0 (0.11711) | 0.0 (0.02301) | 7.35840   |
|                               | % of<br>total heat | 17.0           | 0.0           | 0.0           | 100       |

Table S3. Model results of the impact of chemical composition on viscosity. We separately ran linear models for each measurement temperature of viscosity. The independent factors were the first two principal components (with interaction allowed) and the average chain length of the CHC profile. All factors had  $df=1$ .

| <b>T=20°C</b> | F    | p      |
|---------------|------|--------|
| PC1           | 1.5  | 0.25   |
| PC2           | 0.32 | 0.58   |
| PC1:PC2       | 0.85 | 0.38   |
| chain length  | 0.16 | 0.7    |
| <b>T=25°C</b> |      |        |
| PC1           | 6.24 | 0.024* |
| PC2           | 0.06 | 0.81   |
| PC1:PC2       | 4.23 | 0.056  |
| chain length  | 1.84 | 0.19   |
| <b>T=28°C</b> |      |        |
| PC1           | 3.24 | 0.092  |
| PC2           | 0.01 | 0.91   |
| PC1:PC2       | 1.87 | 0.19   |
| chain length  | 0.46 | 0.51   |

Table S4. Literature data of viscosities of the other liquids shown in Fig. 4.

|                 | viscosity (Pa.s)  | measurement temperature | source                                                                                                                                 |
|-----------------|-------------------|-------------------------|----------------------------------------------------------------------------------------------------------------------------------------|
| hexane          | 0.0003            | 25°C                    | <a href="https://wiki.anton-paar.com">https://wiki.anton-paar.com</a> ; accessed on 11-7-2019                                          |
| water           | 0.001             | 21.1°C                  | <a href="http://www.vp-scientific.com/Viscosity_Tables.htm">http://www.vp-scientific.com/Viscosity_Tables.htm</a> ; accessed 11-7-2019 |
| milk            | 0.003             | 21.1°C                  | <a href="http://www.vp-scientific.com/Viscosity_Tables.htm">http://www.vp-scientific.com/Viscosity_Tables.htm</a> ; accessed 11-7-2019 |
| olive oil       | 0.0562            | 26°C                    | Diamante & Lan 2014                                                                                                                    |
| motor oil SAE10 | 0.11 (0.085-0.14) | 21.1°C                  | <a href="http://www.vp-scientific.com/Viscosity_Tables.htm">http://www.vp-scientific.com/Viscosity_Tables.htm</a> ; accessed 11-7-2019 |
| motor oil SAE40 | 0.775 (0.65-0.9)  | 21.1°C                  | <a href="http://www.vp-scientific.com/Viscosity_Tables.htm">http://www.vp-scientific.com/Viscosity_Tables.htm</a> ; accessed 11-7-2019 |
| honey           | 8156              | 24°C                    | <a href="https://wiki.anton-paar.com">https://wiki.anton-paar.com</a> ; accessed on 11-7-2019                                          |

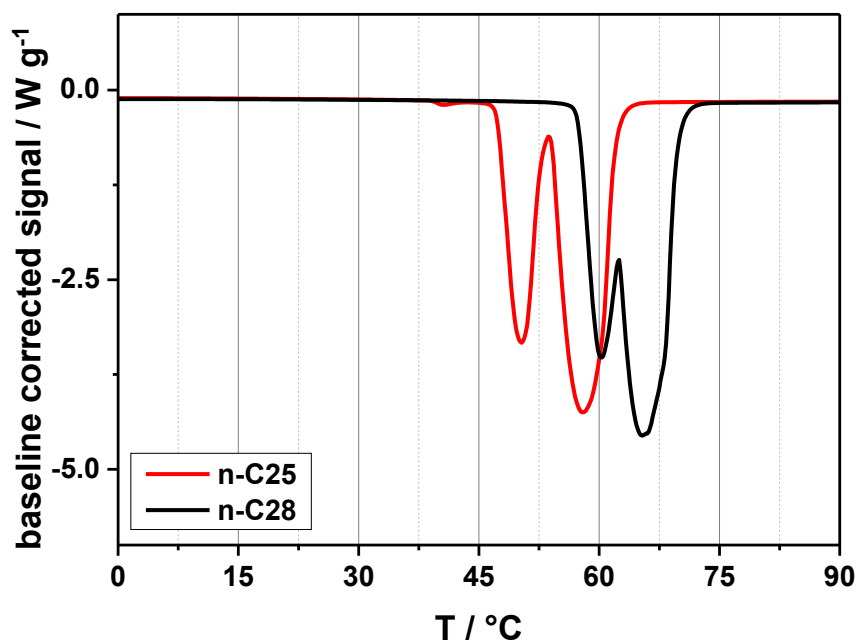

**Fig. S1** DSC melting curves of reference *n*-alkanes (*n*-C25 and *n*-C28). All curves display the second heating cycle (heat rate of 10 K/min), are baseline corrected and normalized to the sample mass. Identified phase transition temperatures are C25:  $T_1 = 50.3$  °C,  $T_2 = 58.0$  °C; C28:  $T_1 = 60.3$  °C,  $T_2 = 65.3$  °C.  $T_1$  results from a solid-solid phase transition between two crystal structures while  $T_2$  represents the actual melting point. The obtained data is in good agreement with reported literature values (Srivastava et al., 1993).

*Formica polyctena*

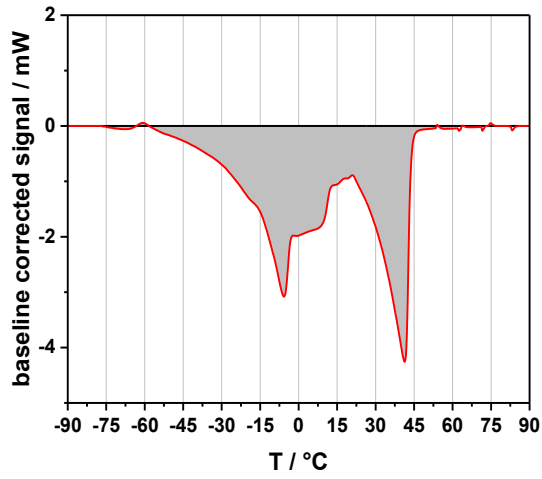

*Myrmica ruginodis*

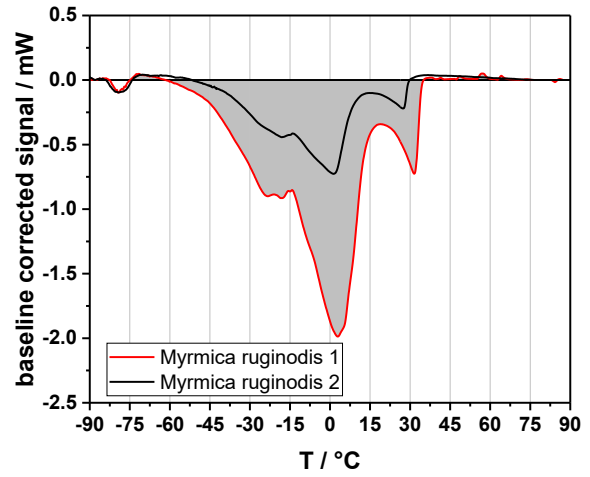

*Formica rufibarbis*

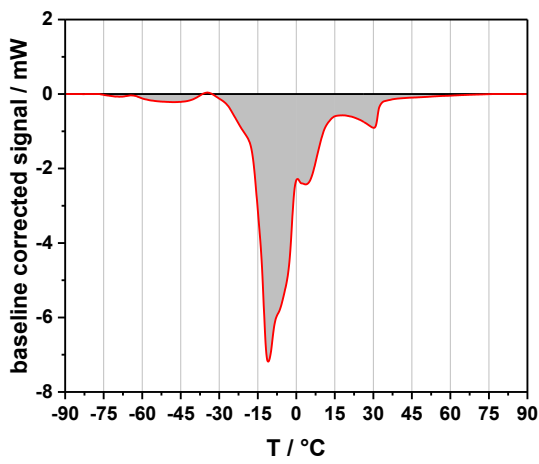

*Myrmica rubra*

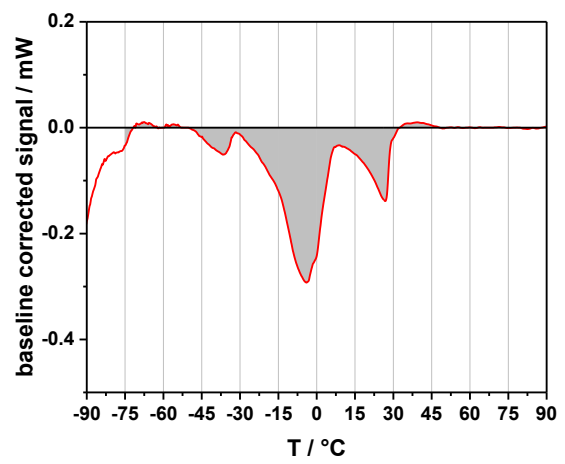

Supplement: jeb210807supp.pdf [file jeb210807supp.pdf]
